# Supplementary material
Source: Springer Nature journal article supplement (https://www.springermedizin.de/resource/supplementary/12911_2013_815_MOESM6_ESM.pdf/9526722)

Patients without cancer

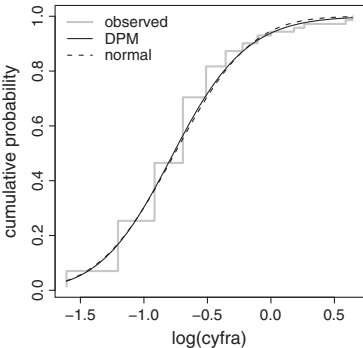

Patients with cancer

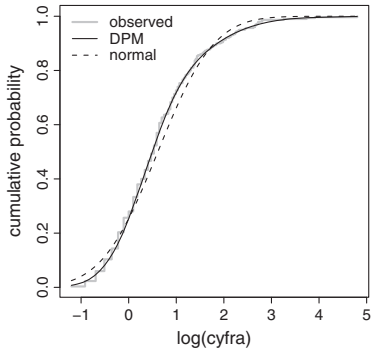

Supplement: MOESM6 [file 9526722]
